# Supplementary material for: TCA cycle rewiring fosters metabolic adaptation to oxygen restriction in skeletal muscle from rodents and humans
Source: PubMed Central journal article supplement (PMC5575144; doi:10.1038/s41598-017-10097-4), 2017-08-29

## Supplementary Information

### **TCA cycle rewiring fosters metabolic adaptation to oxygen restriction in skeletal muscle from rodents and humans.**

Daniele Capitanio, Chiara Fania, Enrica Torretta, Agnese Viganò, Manuela Moriggi, Valentina Bravatà, Anna Caretti, Denny Z.H. Levett, Michael P.W. Grocott, Michele Samaja, Paolo Cerretelli, Cecilia Gelfi\*

\* **Corresponding author:** Professor Cecilia Gelfi, Department of Biomedical Sciences for Health, University of Milan, Via F.lli Cervi 93, 20090, Segrate (MI), Italy. E-mail: [cecilia.gelfi@unimi.it](mailto:cecilia.gelfi@unimi.it)  
Fax: +39(02)21717558

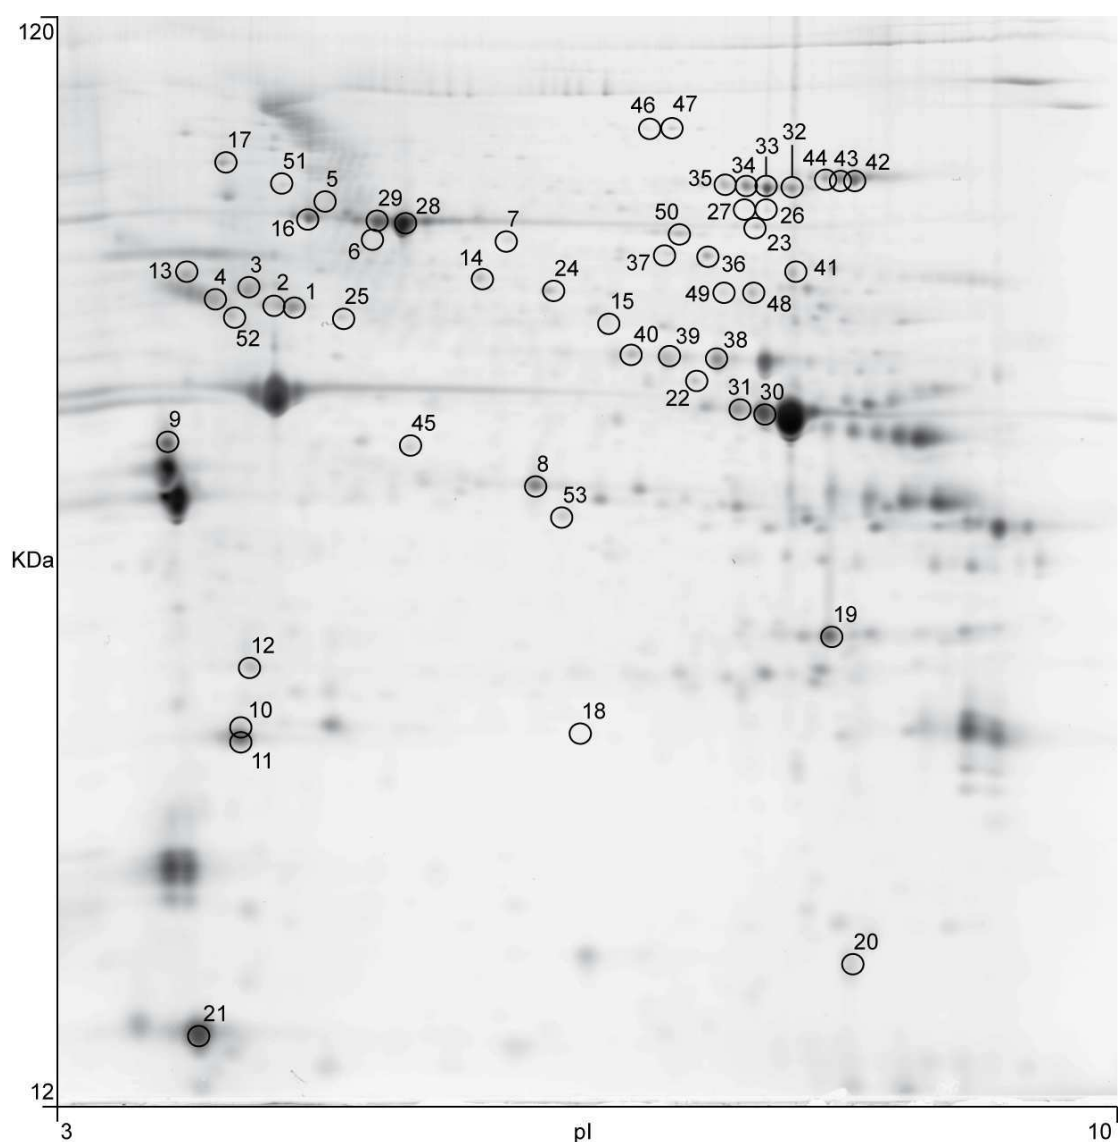

**Supplementary Figure S1.** Protein profiling by 2-D DIGE. Proteins extracts (50  $\mu$ g) from each set type were labelled with 400 pmol Cy5 dye (CyDye, GE healthcare), while an internal standard, generated by pooling together an aliquot of all the muscle samples, was labelled with Cy3 dye. Individual samples (40  $\mu$ g) were combined with an equal amount of internal standard and separated on 24 cm, non linear pH 3-10 gradient IPGstrips (first dimension) and on 20 $\times$ 25 cm<sup>2</sup>, 12% T, 2,5% C polyacrylamide gels (second dimension). Images were acquired with a 532 nm laser beam and 580 nm emission filter. Protein spots significantly changed (ANOVA + Tukey,  $p < 0.01$ ,  $n = 5$ ) in normoxic, 2-day and 10-day hypoxia mice extracts compared to their controls and identified by MALDI ToF/ToF mass spectrometry, are numbered in a representative 2-D map and listed in Supplementary Table S1.



**Supplementary Table S2. Primer sequences used for qRT-PCR analyses.**

| Gene symbol     | Gene ID | Full name                                                 | Forward primer 5'>3' | Reverse primer 5'>3'   | Template size (base pairs) |
|-----------------|---------|-----------------------------------------------------------|----------------------|------------------------|----------------------------|
| AMPK $\alpha$ 1 | 105787  | Protein kinase, AMP-activated, alpha 1                    | agatcggccactacatcctg | atTTTTcccaccacgtcaag   | 148                        |
| BAX             | 12028   | BCL2-associated X protein                                 | gaaccatcatgggctgga   | cagcccatcttctccagat    | 178                        |
| BCL2            | 12043   | B cell leukemia/lymphoma 2                                | gccgagaagaagggaatc   | tgcttgcatcttgatga      | 105                        |
| BECN1           | 56208   | Beclin 1, autophagy related                               | agcctctgaaactggacacg | aaatggctcctcctcctgagtt | 140                        |
| BNIP3           | 12176   | BCL2/adenovirus E1B interacting protein 3                 | ttgtttcactgtcccactt  | ttgctcaaataaaaggata    | 120                        |
| BNIP3L          | 12177   | BCL2/adenovirus E1B interacting protein 3-like            | tgagaagcaggctcgttt   | gctgctcaccgtgagagtt    | 125                        |
| Casp3           | 12367   | Caspase 3                                                 | ggggcggtgttctgtttgt  | ctgattgctaggcagtggt    | 116                        |
| EPAS1           | 13819   | Endothelial PAS domain protein 1 (HIF2 $\alpha$ )         | ctaagtggcctgtgggtgat | gtgtcttgaaggcttgctc    | 232                        |
| HIF1 $\alpha$   | 15251   | Hypoxia inducible factor 1, alpha subunit                 | tggagatgctggctccctat | atcagtggggcagttgtgg    | 185                        |
| LC3A            | 66734   | Microtubule-associated protein 1 light chain 3 alpha      | cggcttctgagtcaagagga | ggacctaccaggatgtggt    | 182                        |
| LC3B            | 67443   | Microtubule-associated protein 1 light chain 3 beta       | ccagaaactgagctccatgc | cccctgacctgctctctg     | 187                        |
| LKB1            | 20869   | Serine/threonine kinase 11                                | ctactccgagggatgttga  | gataggtacgagcgcctcag   | 114                        |
| mTOR            | 56717   | Mechanistic target of rapamycin (serine/threonine kinase) | tccaggaggacattgttca  | cagcatatccctccctcact   | 113                        |

**Supplementary Data.** Full-length blot images (N, normoxic; 2H, 2-day hypoxia; 10H, 10-day hypoxia; SL, sea level; EE, Everest expedition; MR, Mt. Rosa ). Red rectangles highlight bands that are shown in manuscript figures.

## A. HIF-1 $\alpha$ and HIF-2 $\alpha$ signalling

### HIF-1 $\alpha$ (120 KDa)

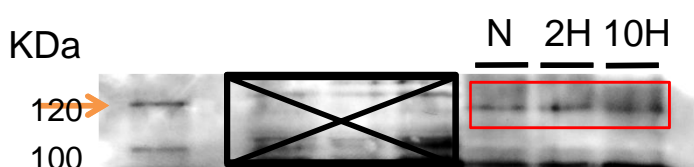

### HIF-2 $\alpha$ (96 KDa)

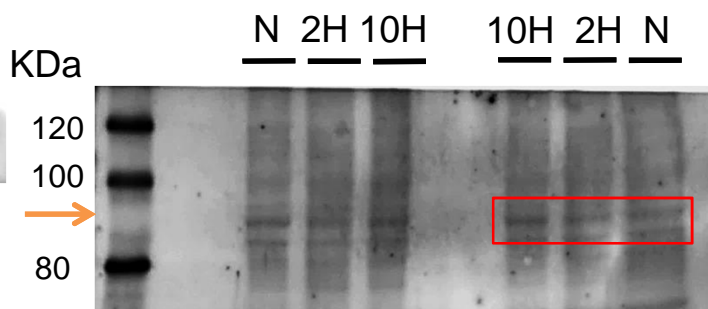

## B. Energy sensing and energetic metabolism regulators

### pAMPK (62 KDa)

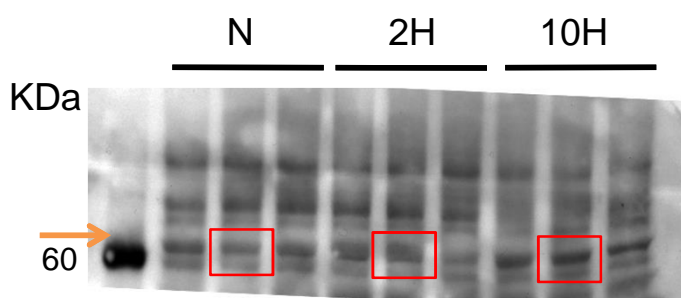

### AMPK (62 KDa)

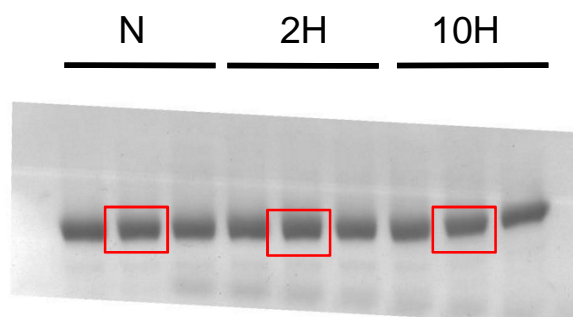

### PGC1 $\alpha$ (90 KDa)

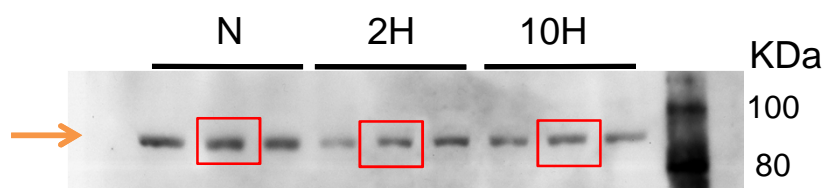

## C. Citrate utilization

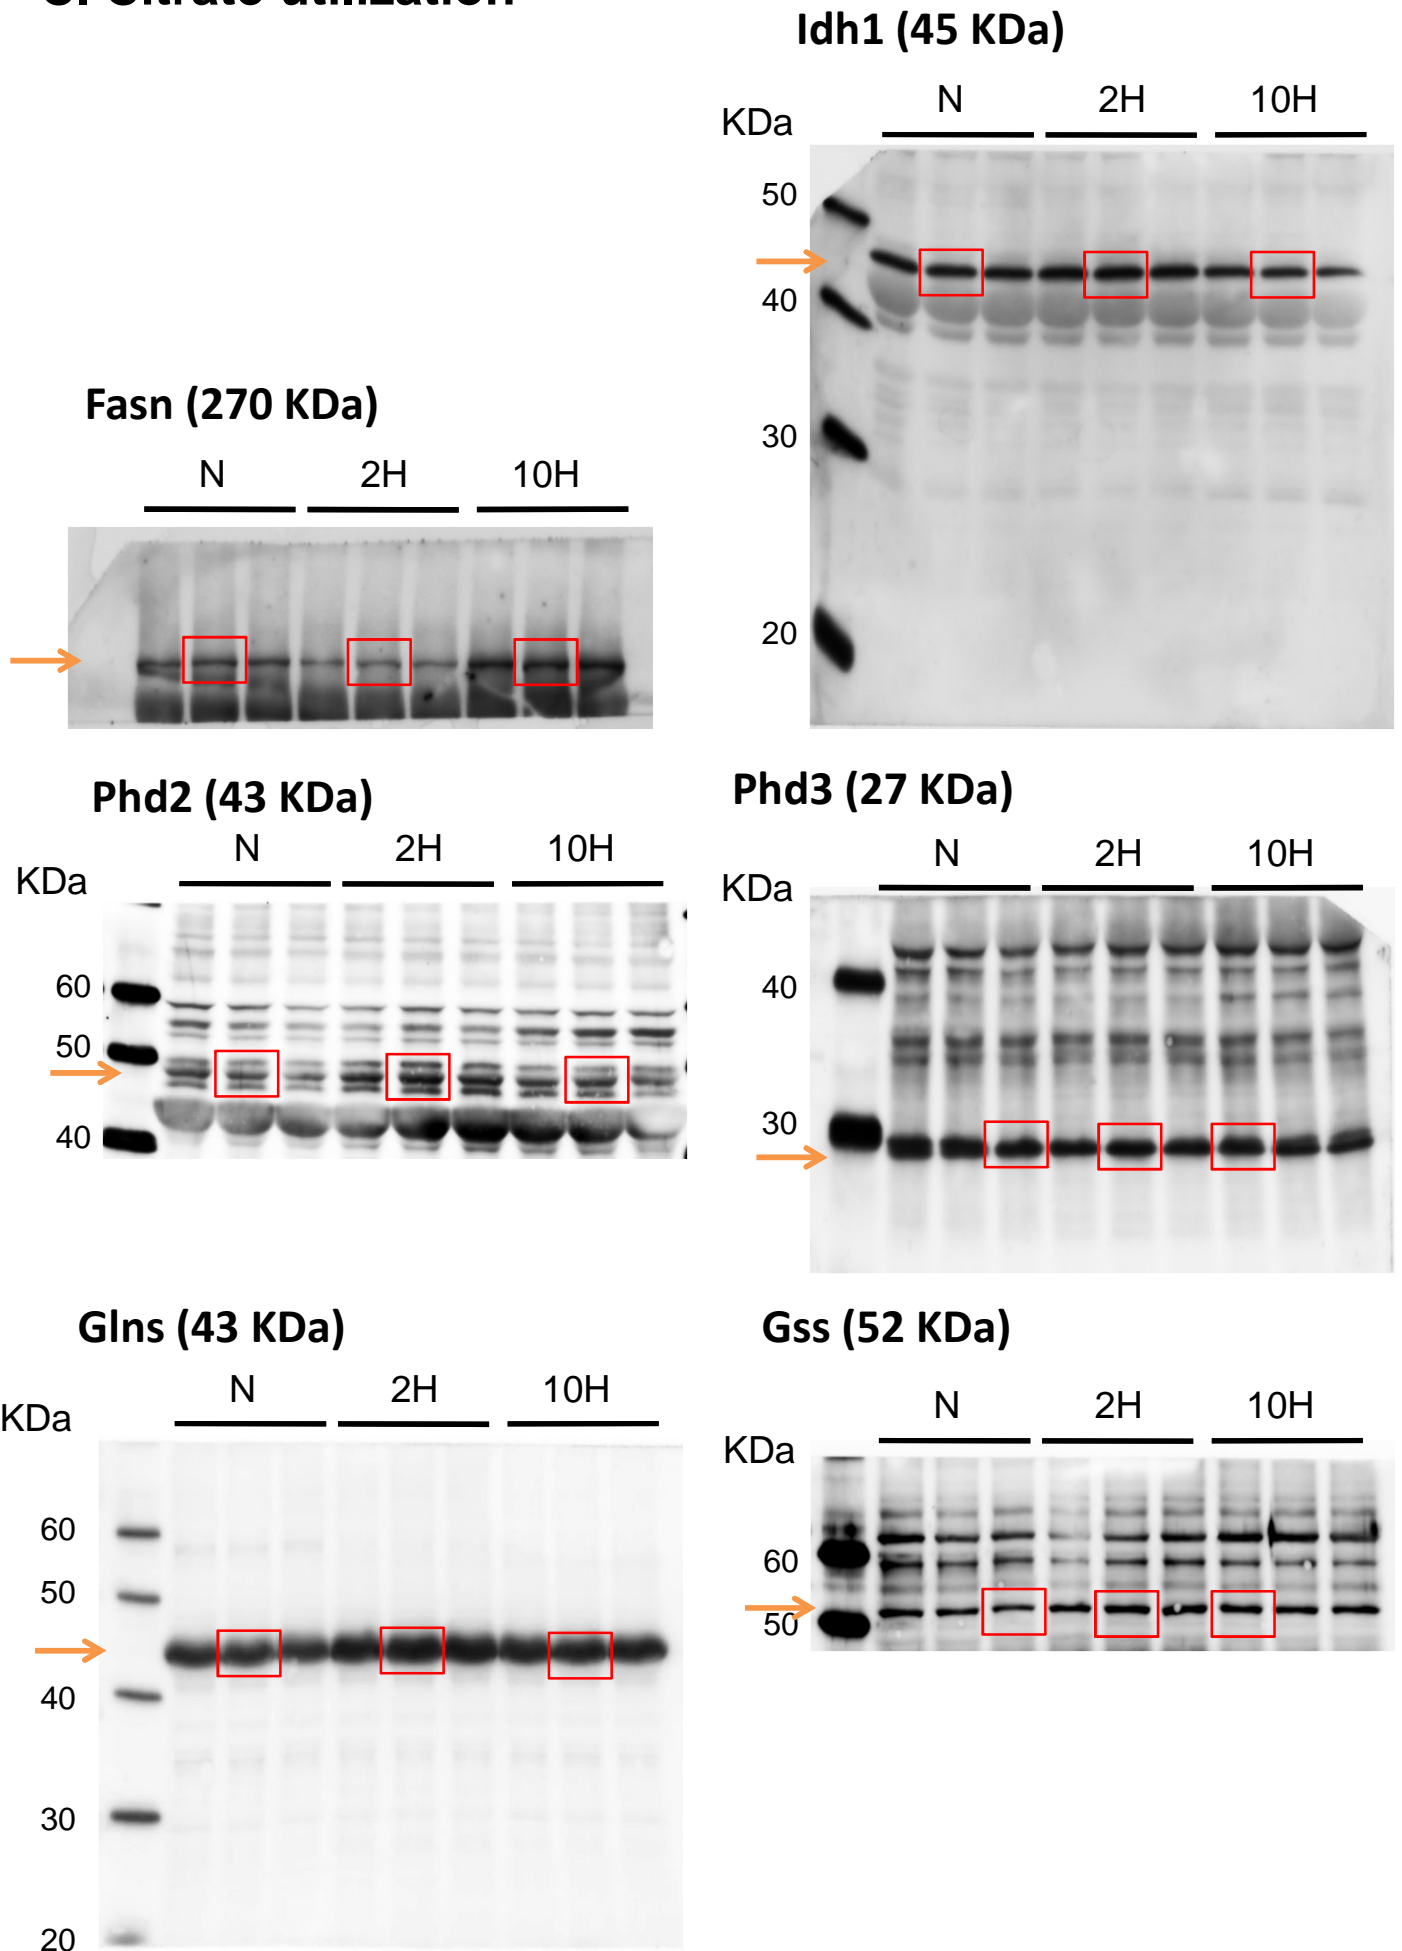

# Sdha (68 KDa)

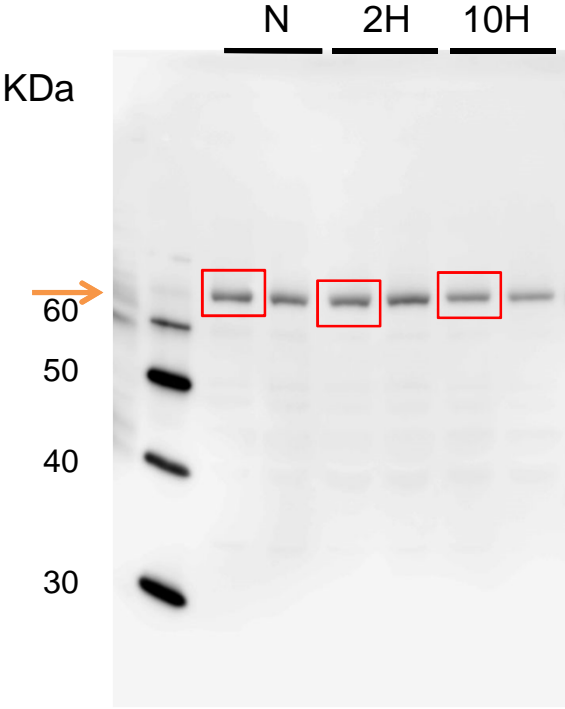

# Mdh2 (36 KDa)

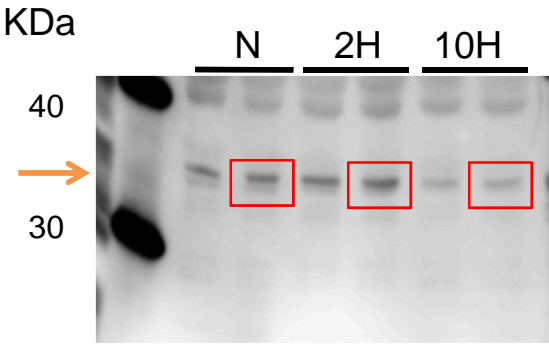

## D. Hexosamine biosynthetic pathway

### Fbp1 (37 KDa)

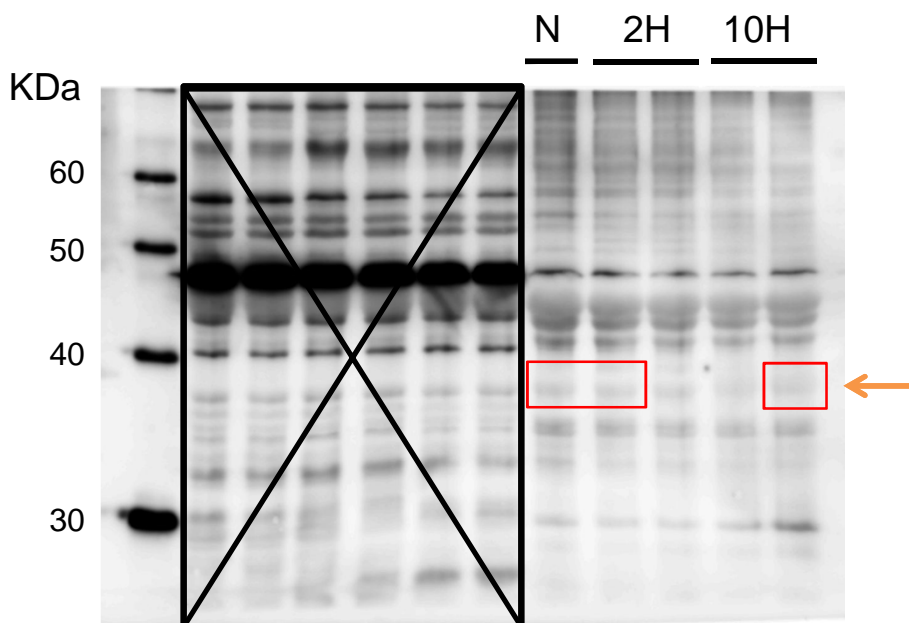

### Uap1 (56-58 KDa)

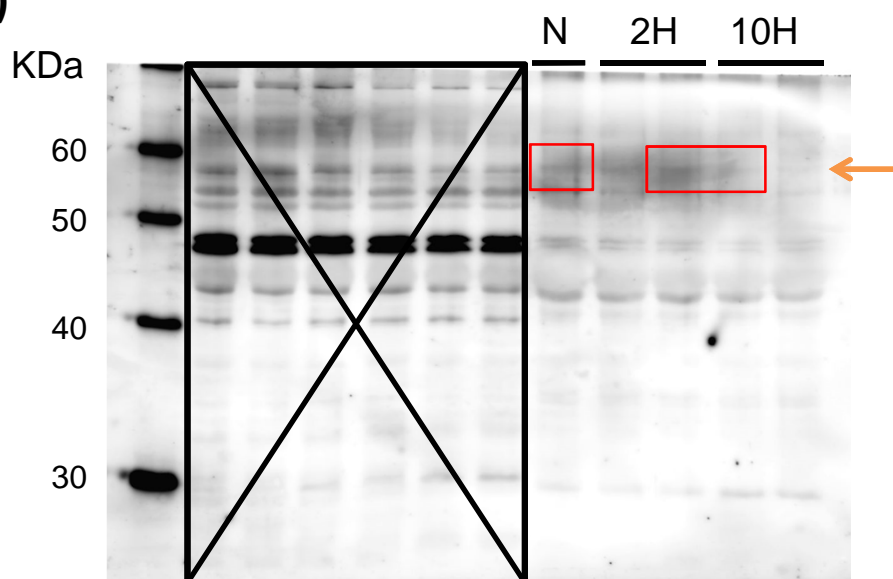

### Gna1 (23 KDa)

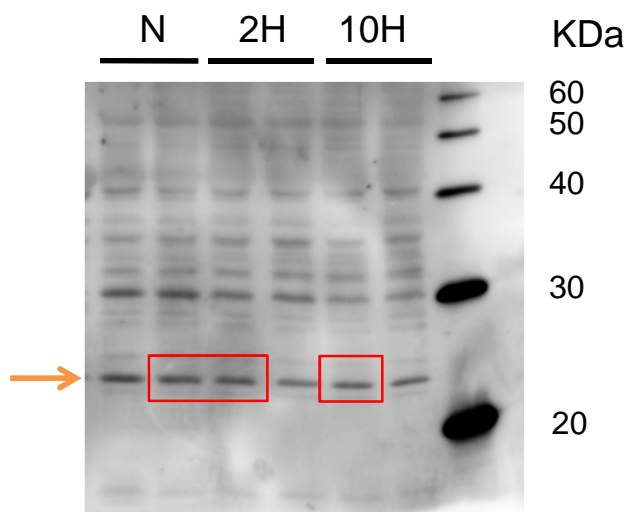



### Ogt (110 KDa)

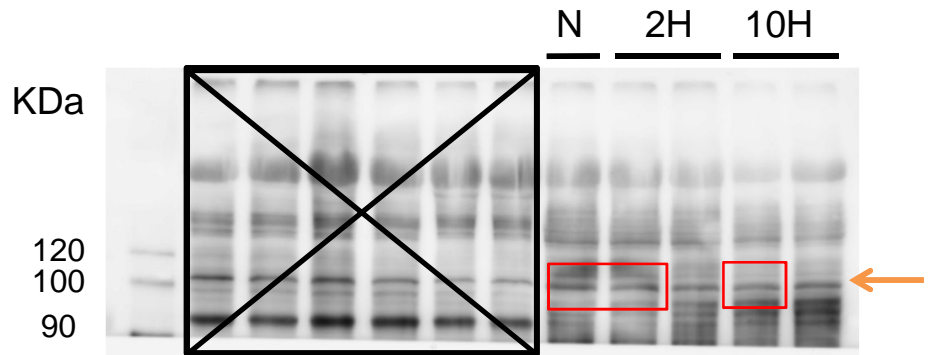

### Oga (130 KDa)

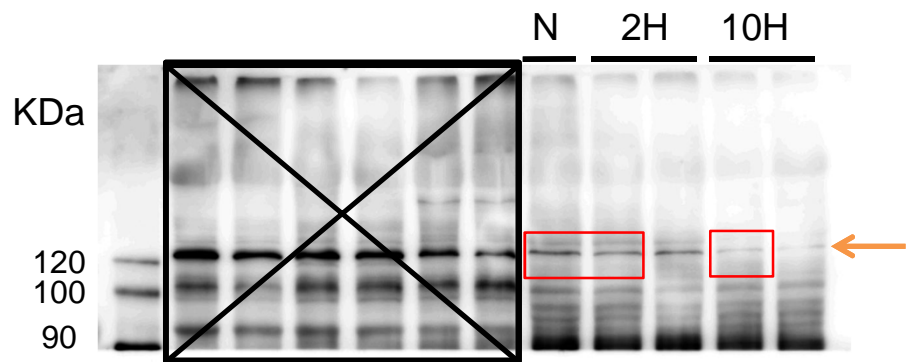

### Stt3b (94-97 KDa)

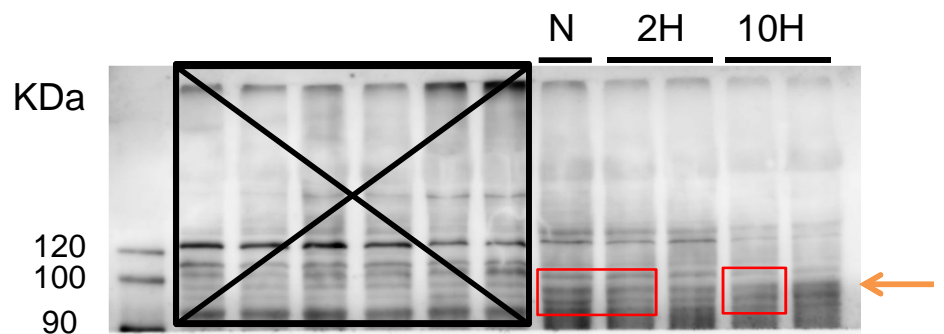

## E. Autophagy

### Bnip3 (22-30 KDa)

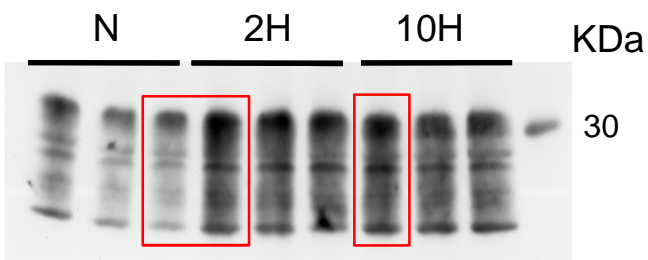

### Bcl2 (26 KDa)

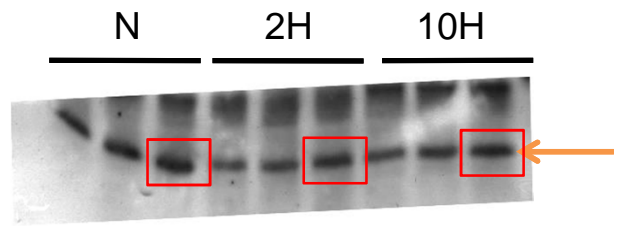

### Becn1 (60 KDa)

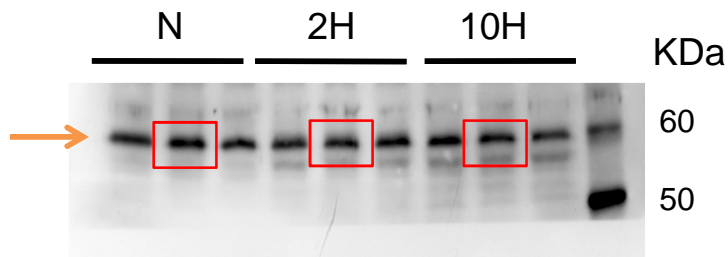

### LC3B-I/LC3B-II (16/14 KDa)

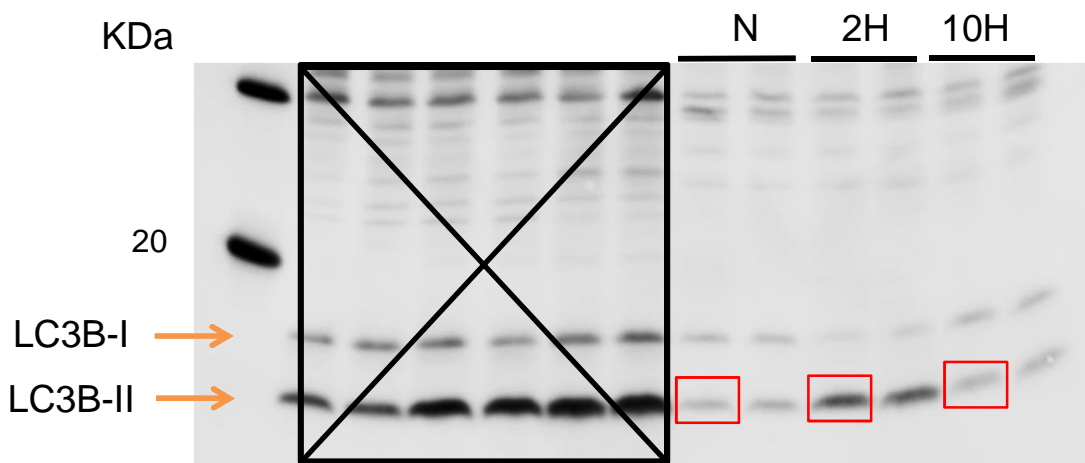

## F. TCA cycle rewiring in hypoxic human skeletal muscle

**Sdha (73 KDa)**

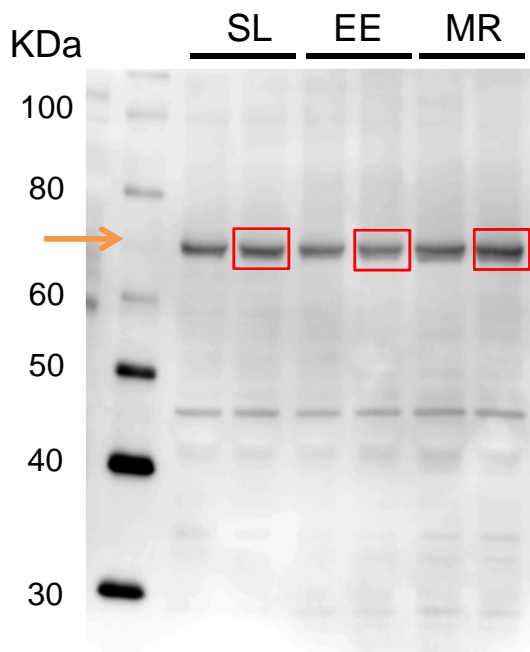

**Aco2 (82 KDa)**

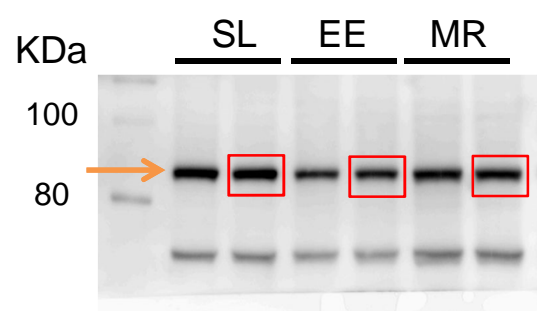

**CS (52 KDa)**

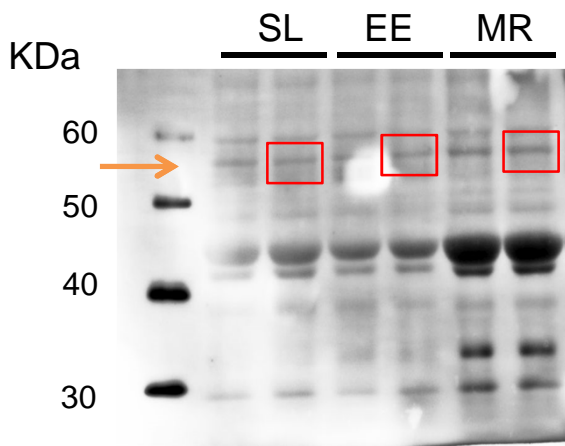

**Mdh2 (36 KDa)**

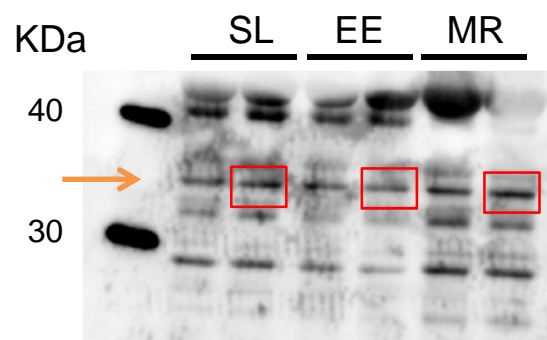

**Fasn (273 KDa)**

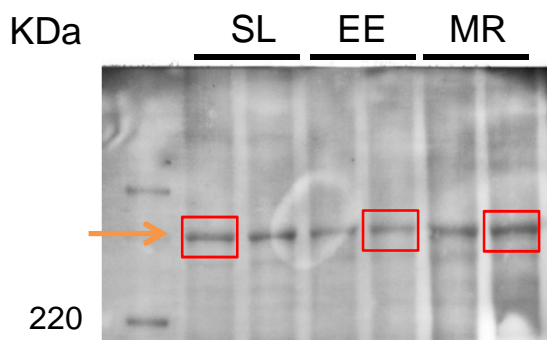

**Idh1 (45 KDa)**

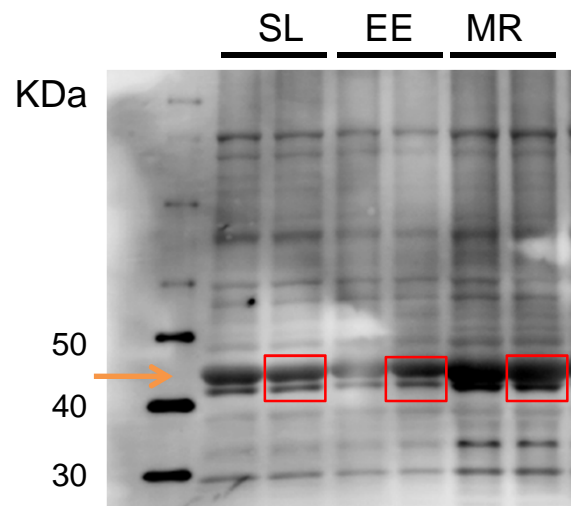

Supplement: 41598_2017_10097_MOESM1_ESM.pdf [file 41598_2017_10097_MOESM1_ESM.pdf]
